# Supplementary material for: Fabrication and Characterization of Single Phase α-Alumina Membranes with Tunable Pore Diameters
Source: MDPI journal article supplement (doi:10.3390/ma8031350), 2015-03-20
Supplement: s1 [file s1]

## Supplementary Information

**Table S1.** Changes in the pore diameters of alumina membranes after heat treatment.

| Electrolytes                | Formation Voltage (V) | Amorphous Alumina Membrane |           | $\alpha$ -alumina Membrane |           |
|-----------------------------|-----------------------|----------------------------|-----------|----------------------------|-----------|
|                             |                       | Top (nm)                   | Rear (nm) | Top (nm)                   | Rear (nm) |
| Oxalic acid                 | 40                    | 62                         | 20        | 69                         | 58        |
| Oxalic acid                 | 60                    | 79                         | 60        | 87                         | 79        |
| Oxalic acid–phosphoric acid | 100                   | 164                        | 97        | 179                        | 152       |
| Phosphoric acid             | 185                   | 282                        | 357       | 343                        | 355       |

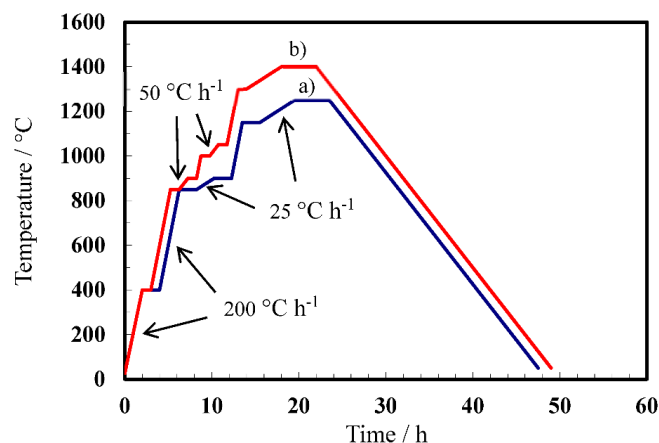

**Figure S1.** Elevated temperature process for crystallization of the alumina membranes formed at (a) 40 V and 60 V and (b) 100 V and 185 V.

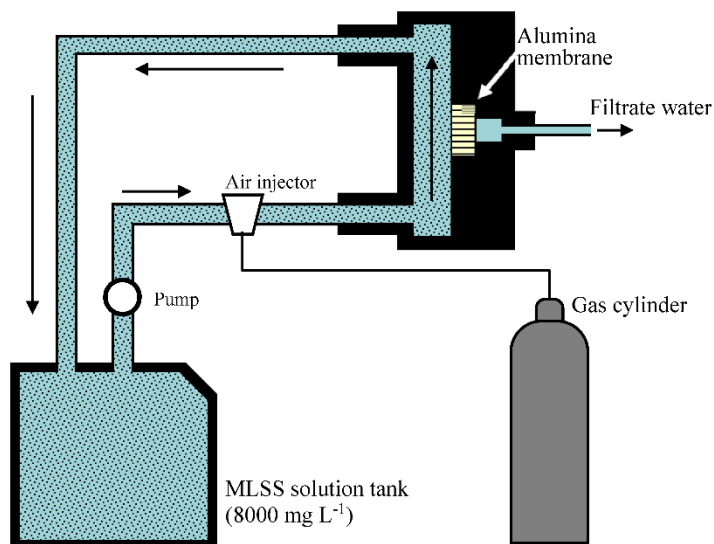

**Figure S2.** Setup for the filtration experiment.
